# Supplementary material
Source: PubMed Central journal article supplement (PMC4135650)
Supplement: JB.01842-14_zjb999093283so1.pdf [file JB.01842-14_zjb999093283so1.pdf]

## Supplemental Materials

**Table S1.** Oligonucleotides used to introduce nucleotide substitutions in each *regA* mutant. Lower case letters denote nucleotide substitution(s) producing an amino acid change.

| <u>mutation</u> | <u>oligonucleotide</u>              |
|-----------------|-------------------------------------|
| D20A/D21A       | 5'-CTTCTCGTGGACGcTGcCGAGCCCTTCCT-3' |
| R27L            | 5'-GCCCTTCCTGAAGCtGCTTGCCAAGGCG-3'  |
| M32K            | 5'-CTTGCCAAGGCGAaGGAGAAGCGGGGT-3'   |
| R35L            | 5'-GCGATGGAGAAGCtGGGTTTCGTTCTC-3'   |
| K49E            | 5'-GTCGCGGAAGGCGAgGCGATCGCCCAG-3'   |
| P57A            | 5'-CAGGCGCGCCCGgCGGCCTATGCAGTG-3'   |
| D63A(-P)        | see reference 37                    |
| E67K            | 5'-GACCTGCGGCTCaAGGACGGCAACGGG-3'   |
| R79G            | 5'-GTCGAGGTGCTGgGCGAGCGCCGGCCC-3'   |
| D84A            | 5'-GAGCGCCGGCCCGcTTGCCGCATCGTG-3'   |
| T91A            | 5'-ATCGTGGTGCTGgCGGGCTACGGCGCCA-3'  |
| A97S            | 5'-TACGGCGCCATTtCGACGGCGGTCGCC-3'   |
| D109A           | 5'-ATCGGCGCCACGGcCTACCTGTCCAAG-3'   |
| K113M           | 5'-GACTACCTGTCCA tGCCCCCGACGCCA-3'  |
| P134A           | 5'-AGCCTGCCCCCGgCGCCGAAAATCCG-3'    |
| W146G           | 5'-GACCGCGTGCGGgGGGAGCACATCCAG-3'   |
| C156G           | 5'-GAATCTACGAAATGgGCGACCGCAATGTC-3' |
| N159S           | 5'-TGTGCGACCGCAgTGTCTCGGAGAC-3'     |
| S161A           | 5'-GACCGCAATGTCgCGGAGACCGCCCGG-3'   |
| S161P           | 5'-GACCGCAATGTCcCGGAGACCGCCCGG-3'   |

E162G 5'-GCAATGTCTCGGgGACCGCCCCGGAGGCT-3'  
E162K 5'-GCAATGTCTCGaAGACCGCCCCGGAGGCT-3'  
T163A 5'-CAATGTCTCGGAGgCCGCCCCGGAGGCTC-3'  
T163P 5'-CAATGTCTCGGAGcCCGCCCCGGAGGCTC-3'  
A164D 5'-GTCTCGGAGACCGaCCGGAGGCTCAAC-3'  
A164V 5'-GTCTCGGAGACCGtCCGGAGGCTCAAC-3'  
A164G 5'-GTCTCGGAGACCGgCCGGAGGCTCAAC-3'  
A164S 5'-GTCTCGGAGACctCCCGGAGGCTCAAC-3'  
R165G 5'-CTCGGAGACCGCCgGGAGGCTCAACATG-3'  
R165H 5'-TGTCTCGGAGACCGCCcAcAGGCTCAACATGCAC-3'  
R166G 5'-AGACCGCCCCGGgGGCTCAACATGCA-3'  
L167H 5'-ACCGCCCCGGAGGCaCAACATGCACCGG-3'  
L167P 5'-ACCGCCCCGGAGGCcCAACATGCACCGG-3'  
N168Y 5'-GCCCCGAGGCTctACATGCACCGGCGGA-3'  
M169T 5'-CGGAGGCTCAACAcGCACCGGCGGACG-3'  
H170D 5'-AGGCTCAACATGgACCGGCGGACGCTG-3'  
R171G 5'-CTCAACATGCACgGGCGGACGCTGCAG-3'  
R172A 5'-TCAACATGCACCGGgcGACGCTGCAGCGCAT-3'  
T173P 5'-CATGCACCGGCGGcCGCTGCAGCGCATC-3'  
L174A 5'-ATGCACCGGCGGACGgcGCAGCGCATCCTGGCG-3'  
L174W 5'-ATGCACCGGCGGACGtgGCAGCGCATCCTGGCG-3'  
Q175A 5'-CACCGGCGGACGCTGgcGCGCATCCTGGCGAAG-3'  
I177N 5'-ACGCTGCAGCGCAaCCTGGCGAAGCGC-3'  
L178A 5'-ACGCTGCAGCGCATCgcGGCGAAGCGCAGCCCCG-3'  
L178W 5'-ACGCTGCAGCGCATctgGGCGAAGCGCAGCCCCG-3'

**Table S2.** Oligonucleotides used for the construction of pETCbbR/201, pETCbbR/204, and pVK442.

Underlined sequences denote restriction enzyme sites.

pETCbbR/201:

for amplification { 5'-GCATTTCATATGGTGCGGCTCGATGCGATCA-3'  
5'-GCATTTGGATCCTCATCAGCCCTCGCTCACCGCCATCACTTG-3'

pETCbbR/204:

for amplification { 5'-GCATTTCATATGACGCTCGCCGGAATCGCCGTTCTC-3'  
5'-GCATTTGGATCCTCATCAGGCGGGGGCGCCGGGCAGATA-3'

pVK442:

5'-GAGGGCCGGGCCGGGTAGGGTACCCTGGGTGTGGTCTCG-3' (create 1<sup>st</sup> KpnI site)

5'-CTATCTGCCCCGGCGCCGGTACCTGAGCCGTCAGACG-3' (create 2<sup>nd</sup> KpnI site)

**Table S3.** Oligonucleotides used for the RT-PCR analysis of *cbbR* transcripts from 87/CbbR(wt), 87/CbbR(trunc), and HR.

forward: 5'-CTCGATGCCATCACCTGAAGCAGCTG-3'

reverse and RT: 5'-CTGCGACAGAATGACCTCGATCCGCTG-3'
